# Supplementary material for: Status and determinants of small farming households' food security and role of market access in enhancing food security in rural Pakistan
Source: PubMed Central journal article supplement (PMC5659641; doi:10.1371/journal.pone.0185466), 2017-10-27
Supplement: pone.0185466.s001.pdf [file pone.0185466.s001.pdf]

# S1 Table

## HOUSEHOLD FOOD SECURITY QUESTIONNAIRE

HH\_ID: \_\_\_\_\_ Enumerator's Name: \_\_\_\_\_

District: \_\_\_\_\_ Village: \_\_\_\_\_ Date: \_\_\_\_\_

### A.1. Personal and demographic information of the households

Name of the Respondent: \_\_\_\_\_ Gender: Male    Female

Respondent is the household head?            1) Yes            2) No,

if No, Relationship with household head \_\_\_\_\_

Age of the Respondent: \_\_\_\_\_ Age of the household head: \_\_\_\_\_

Household Members: \_\_\_\_\_ Total earning hands: \_\_\_\_\_

| Age in Years | Male Member | Females Members | Total |
|--------------|-------------|-----------------|-------|
| < 1          |             |                 |       |
| 1-9          |             |                 |       |
| 10-17        |             |                 |       |
| Adults       |             |                 |       |

Education level of household head (tick one of the followings)

- |                                                   |                                   |
|---------------------------------------------------|-----------------------------------|
| 1- Illiterate                                     | 2- 5 Years of schooling (Primary) |
| 3- 8 Years of schooling (Middle)                  | 4- 10 years of schooling (High)   |
| 5- 12 years of schooling (FA/FSc)<br>(Graduation) | 6- Above 12 years of schooling    |
| 6- Masters                                        | 7- Others (Diploma, etc.)         |

Decision making regarding food purchase / consumption: Household head (Male) \_\_\_\_\_

Spouse (Female) \_\_\_\_\_

Tenancy Status

- |           |                                |
|-----------|--------------------------------|
| 1- Owner  | Owned area (acres): _____      |
|           | Rented in area (acres): _____  |
|           | Rented out area (acres): _____ |
| 2- Tenant | Rented in area (acres): _____  |

Does the household support anyone living outside the home with money or food during last 12 months?

Yes

No

Support value in money = RS. \_\_\_\_\_

If yes then tick all those that apply

- 1) Other family member(s) living in rural area
- 2) Other family member(s) living in urban area
- 3) Other family member(s) living abroad
- 4) Others (Specify)

**Is the household getting any support (cash, food, non-food essential services & goods, etc.) from anyone outside the household at present? If yes then what are those?**

Cash for food purchases

Yes

No

Cash for other non- food essential (school, fees, rentals, other bills)

Yes

No

Food (in kind)

Yes

No

Other (specify)

**Assets at household home and farm**

| Sr. No. | Assets                | Number | Value (Rs) |
|---------|-----------------------|--------|------------|
| 1       | House                 |        |            |
|         | Car                   |        |            |
|         | Motor cycle           |        |            |
|         | Tractor               |        |            |
|         | TV                    |        |            |
|         | Oven                  |        |            |
|         | Refrigerator          |        |            |
|         | Air Conditioner       |        |            |
|         | Other Farm Equipments |        |            |

What is the source of drinking water:

Ground Water

Canal Water

What's your opinion about the quality of drinking water you used:

Good

Bad

Are you use water after boiling:

Yes

No

Are you use home toilet or open toilet:

Home toilet

Open toilet

Where you put waste water and toilet waste:

Pond (Gutter)

Sewerage

What is the system of sewerage:

Open

Closed

What is the situation of cleanliness at your home: Good Bad  
 Are the household members wash hands with soap after using toilet: Yes No  
 If yes; with which soap: \_\_\_\_\_ (Specify name)

What is the frequency of illness in household members e.g. diarrhea or other diseases

- i) Once in a week
- ii) Once in a month
- iii) Once in 3 months
- iv) Once in 12 months

How many doctors are there in the village: \_\_\_\_\_

**A.2. Food consumption information for calorie intake calculations (Quantitative information to measure food security – calorie / protein intake method)**

**A. Food Consumption related data, last 7 and 30 days**

| <b>Calorie chart for one household</b> |                     |                  |                                        |                                       |                                         |
|----------------------------------------|---------------------|------------------|----------------------------------------|---------------------------------------|-----------------------------------------|
| <b>Sr. No.</b>                         | <b>English name</b> | <b>Urdu name</b> | <b>Quantity consumed (Kg) (7 days)</b> | <b>Quantity bought (Kg) (30 days)</b> | <b>Quantity Consumed (Kg) (30 days)</b> |
| <b>A.1) Bread related</b>              |                     |                  |                                        |                                       |                                         |
| 1                                      | Barley              | Jou              |                                        |                                       |                                         |
| 2                                      | Rice                | Chaval           |                                        |                                       |                                         |
| 4                                      | Wheat grain flour   | Aata             |                                        |                                       |                                         |
| 5                                      | Wheat flour         | Maida            |                                        |                                       |                                         |
| 6                                      | Wheat flour         | Suji             |                                        |                                       |                                         |
| 7                                      | Biscuit             | Biscuit          |                                        |                                       |                                         |
| <b>A.2) Garam masala</b>               |                     |                  |                                        |                                       |                                         |
| 8                                      | Garam masala        | Masala           |                                        |                                       |                                         |
| <b>A.3) Fats and oil</b>               |                     |                  |                                        |                                       |                                         |
| 9                                      | Butter              | Makhan           |                                        |                                       |                                         |

|                                                          |                  |        |  |  |  |
|----------------------------------------------------------|------------------|--------|--|--|--|
| 10                                                       | Banaspati        | Ghee   |  |  |  |
| 11                                                       | Oil              | Tail   |  |  |  |
| <b>A.4) Sugar, sweets and beverages</b>                  |                  |        |  |  |  |
| 12                                                       | Sugar            | Cheeni |  |  |  |
| 13                                                       | Gur              |        |  |  |  |
| <b>A.5) Legumes</b>                                      |                  |        |  |  |  |
| 14                                                       | Legumes (4)      | Dalain |  |  |  |
| <b>A.6) Vegetables</b>                                   |                  |        |  |  |  |
| 15                                                       | Onion            | Piaz   |  |  |  |
| 16                                                       | Potato           | Aalu   |  |  |  |
| 17                                                       | Vegetables       | Sabzi  |  |  |  |
| <b>A.7) Fruits</b>                                       |                  |        |  |  |  |
| 18                                                       | Fruits           | Phall  |  |  |  |
| <b>A.8) Meat</b>                                         |                  |        |  |  |  |
| 19                                                       | Beef             | Ghosht |  |  |  |
| 20                                                       | Chicken          | Ghosht |  |  |  |
| 21                                                       | Goat/Lamb        | Ghosht |  |  |  |
| 22                                                       | Fish             | Machli |  |  |  |
| <b>A.9) Egg</b>                                          |                  |        |  |  |  |
| 23                                                       | Eggs (one piece) | Anda   |  |  |  |
| <b>A.10) Dairy products</b>                              |                  |        |  |  |  |
| 24                                                       | Milk             | Doodh  |  |  |  |
| 25                                                       | Curd             | Dehi   |  |  |  |
| 26                                                       | Cheese           | Paneer |  |  |  |
| <b>A.11) Other food items which you consume commonly</b> |                  |        |  |  |  |
| 27                                                       |                  |        |  |  |  |
| 28                                                       |                  |        |  |  |  |
| 29                                                       |                  |        |  |  |  |
| 30                                                       |                  |        |  |  |  |

|    |  |  |  |  |  |
|----|--|--|--|--|--|
| 31 |  |  |  |  |  |
| 32 |  |  |  |  |  |
| 33 |  |  |  |  |  |

**A.3. Household food security qualitative questions (during last 12 months)**

Q.3.1. What do you consider as basic daily food requirement for your household?

---



---



---

Q.3.2. Considering basic daily food requirements as minimum food intake required for life: do you think that the basic daily food intake of your household has improved?

Yes                      No

If yes, to what extent?

- a. Slightly better
- b. Better
- c. Much better

If no, then?

- a. Same
- b. Worse
- c. Much worse

Q.3.3. Did you or other household members ever skip a meal because there was not enough money to buy food over last 12 months?

- a. Once a week
- b. Once a month
- c. Once in 3 months
- d. Once in 6 months
- e. Never skipped the meal.
- f. Don't know

Q.3.4. Did you or other household members ever not eat for a whole day because of lack of money to buy food?

- a. Once a week

- b. Once a month
- c. Once in 3 months
- d. Once in 6 months
- e. Never happened.
- f. Don't know

Q.3.5. Did you or other household members ever eat less than you or they would have needed to eat?

- a. Once a week
- b. Once a month
- c. Once in 3 months
- d. Once in 6 months
- e. Never
- f. Don't know

Q.3.6. Sometimes people lose weight because of not having enough to eat. In the past 12 months did you lose weight due to not enough food?

- a. Yes
- b. No
- c. Don't know

Q.3.7. Did you ever cut the size of children's meals due to not enough food available?

- a. Once a week
- b. Once a month
- c. Once in 3 months
- d. Once in 6 months
- e. Never
- f. Don't know

Q.3.8. Did any of the children ever skip a meal due to not enough food?

- a. Once a week
- b. Once a month
- c. Once in 3 months
- d. Once in 6 months
- e. Never

- f. Don't know

Q.3.9. Did any of the children ever not eat for a whole day because of lack of money to buy food?

- a. Once a week
- b. Once a month
- c. Once in 3 months
- d. Once in 6 months
- e. Never
- f. Don't know

Q.3.10. "I worried whether our food would run out before we got money to buy more".

What was the frequency of this situation?

- a. Once a week
- b. Once a month
- c. Once in 3 months
- d. Once in 6 months
- e. Never
- f. Don't know

Q.3.11. In your opinion what is a balanced meal?

---

---

---

Q.3.12. "We could not afford to eat balanced meals" what was the frequency?

- a. Once a week
- b. Once a month
- c. Once in 3 months
- d. Once in 6 months
- e. Never
- f. Don't know

Q.3.13. "We could not feed the children a balanced diet due to lack of money" what was the frequency?

- a. Once a week

- b. Once a month
- c. Once in 3 months
- d. Once in 6 months
- e. Never
- f. Don't know

Q.3.14. How you dealt with such situation (food shortage) over last 12 months?

(Tick all that apply)

- a. Borrowing from friends, neighbors, relatives, etc.
- b. Stick to simple food (e.g. dal roti or roti piaz)
- c. Reduce expenditures on health
- d. Reduce expenditures on education
- e. Adults skip meals once a day
- f. Selling assets (e.g. cycle, motorcycle, bull, farm equipment, etc)
- g. Others (Please specify)

---

Q.3.15. Due to heavy flooding in the country general price level is expected to increase with expected shortage of food items, how you will deal with such situation, any planning?

Yes

No

If yes, please explain

---

---

Q.3.16. Do you smoke?

Yes

No

If yes

- a. Less than half **a pack** per day
- b. Half a pack daily
- c. One pack daily
- d. Two packs daily
- e. Three packs daily



f. Four packs daily

‘a pack’ = 20 cigarettes

Q.3.17. Which brand do you normally smoke? ----- (Please Specify)

| <b>In the <u>past 2 years</u>, what difficulties have negatively impacted your household's ability to meet your food needs?</b> |                                                              |                                           |
|---------------------------------------------------------------------------------------------------------------------------------|--------------------------------------------------------------|-------------------------------------------|
| <b>Shock</b>                                                                                                                    | <b>Tick all the difficulties identified by the household</b> | <b>Rank the <u>top 3</u> difficulties</b> |
| Loss of employment/ reduced salary                                                                                              |                                                              |                                           |
| Sickness/ health expenditures                                                                                                   |                                                              |                                           |
| Death of household head                                                                                                         |                                                              |                                           |
| High food prices                                                                                                                |                                                              |                                           |
| Debt to reimburse                                                                                                               |                                                              |                                           |
| Insecurity/ thefts                                                                                                              |                                                              |                                           |
| Crop disease                                                                                                                    |                                                              |                                           |
| Animal disease / death                                                                                                          |                                                              |                                           |
| Lack of irrigation water                                                                                                        |                                                              |                                           |
| Bad climate(poor crop yield/harvest)                                                                                            |                                                              |                                           |
| Others (Please specify)                                                                                                         |                                                              |                                           |
|                                                                                                                                 |                                                              |                                           |
|                                                                                                                                 |                                                              |                                           |



|                                                                |             |               |                 |                  |
|----------------------------------------------------------------|-------------|---------------|-----------------|------------------|
| Taxes                                                          |             |               |                 |                  |
| Weddings of relatives                                          |             |               |                 |                  |
| Expenditures on legal matters like courts, police station etc. |             |               |                 |                  |
| Other major exp.                                               |             |               |                 |                  |
| Proportion of income spent on (%)                              | <u>Food</u> | <u>Health</u> | <u>Clothing</u> | <u>Education</u> |
|                                                                |             |               |                 |                  |

**\*A.4.3. Farm Production, Expenditure and Income Data**

\*Q.A.4.3.1. Which crops have you grown in last 12 months? (Tick all that apply)

- a. Wheat
- b. Barley
- c. Rice
- d. Cotton
- e. Sugarcane
- f. Maize
- g. Vegetables

\*Q.A.4.3.2. Please mention the fertilizers you applied for each of these crops

| <b>Crops</b> | <b>Urea</b> (Number of bags) | <b>DAP</b> (Number of bags) | <b>FYM</b> Number of Trolleys | <b>Others</b> (Number of bags) |
|--------------|------------------------------|-----------------------------|-------------------------------|--------------------------------|
| <b>Price</b> |                              |                             |                               |                                |
| Wheat        |                              |                             |                               |                                |
| Barley       |                              |                             |                               |                                |
| Rice         |                              |                             |                               |                                |
| Cotton       |                              |                             |                               |                                |
| Sugarcane    |                              |                             |                               |                                |
| Maize        |                              |                             |                               |                                |
| Vegetables   |                              |                             |                               |                                |

**\*Q.A.4.3.3.** Please mention the seed rates you used for each of these crops

| <b>Crops</b> | <b>Area Sown (acres)</b> | <b>Seed Used Kg/acre</b> | <b>Prices (Rs.)</b> |
|--------------|--------------------------|--------------------------|---------------------|
| Wheat        |                          |                          |                     |
| Barley       |                          |                          |                     |
| Rice         |                          |                          |                     |
| Cotton       |                          |                          |                     |
| Sugarcane    |                          |                          |                     |
| Maize        |                          |                          |                     |
| Vegetables   |                          |                          |                     |

**\* Q.A.4.3.4.** Please mention the plant protection treatments you applied for each of these crops

| <b>Crops</b> | <b>No. of treatments /<br/>acre</b> | <b>Price / treatment / acre<br/>(Rs.)</b> | <b>Total area<br/>treated</b> |
|--------------|-------------------------------------|-------------------------------------------|-------------------------------|
| Wheat        |                                     |                                           |                               |
| Barley       |                                     |                                           |                               |
| Rice         |                                     |                                           |                               |
| Cotton       |                                     |                                           |                               |
| Sugarcane    |                                     |                                           |                               |
| Maize        |                                     |                                           |                               |
| Vegetables   |                                     |                                           |                               |

**\*Q.A.4.3.5.** Please mention the expenditures on irrigation for these crops

| <b>Crops</b> | <b>Tube well</b>                     |                                                        | <b>Canal Water<br/>(Aabyaana)<br/>(Rs.)</b> |
|--------------|--------------------------------------|--------------------------------------------------------|---------------------------------------------|
|              | <b>If Purchased = Cost<br/>(Rs.)</b> | <b>If owned at what price<br/>would you sell (Rs.)</b> |                                             |
| Wheat        |                                      |                                                        |                                             |
| Barley       |                                      |                                                        |                                             |

|            |  |  |  |
|------------|--|--|--|
| Rice       |  |  |  |
| Cotton     |  |  |  |
| Sugarcane  |  |  |  |
| Maize      |  |  |  |
| Vegetables |  |  |  |

\* Q.A.4.3.6. Please mention the expenditures on Labor/family labor

Wage = In cash \_\_\_\_\_ Rs. per person per day

In Kind \_\_\_\_\_ Kg. per person per day

**Land Rent** = (if applicable) ----- (for a year) for \_\_\_\_\_ acres

| Labor used for | Number of persons | Number of days | If different rates for sugarcane or other crops |
|----------------|-------------------|----------------|-------------------------------------------------|
| Sowing         |                   |                |                                                 |
| Weeding        |                   |                |                                                 |
| Harvesting     |                   |                |                                                 |
| Spray          |                   |                |                                                 |

\*Q.A.4.3.7. Please mention the expenditures on Marketing of your produce

| Crops      | Quantity (mds) marketed | Transportation Costs (Rs.) to the nearest market | Market charges (Rs.) (fee, taxes, etc) |
|------------|-------------------------|--------------------------------------------------|----------------------------------------|
| Wheat      |                         |                                                  |                                        |
| Barley     |                         |                                                  |                                        |
| Rice       |                         |                                                  |                                        |
| Cotton     |                         |                                                  |                                        |
| Sugarcane  |                         |                                                  |                                        |
| Maize      |                         |                                                  |                                        |
| Vegetables |                         |                                                  |                                        |
| Other      |                         |                                                  |                                        |

\* Q.A.4.3.8. Please mention the expenditures on livestock

| <b>Livestock</b> | <b>Numbers of animals (at the time of interview)</b> | <b>Feed (Rs. Per month)</b> | <b>Medicine (Rs. Per month)</b> | <b>Other expenditures (Rs.) (tools, fence replacements, etc.)</b> |
|------------------|------------------------------------------------------|-----------------------------|---------------------------------|-------------------------------------------------------------------|
| Goats            |                                                      |                             |                                 |                                                                   |
| Sheep            |                                                      |                             |                                 |                                                                   |
| Buffalo          |                                                      |                             |                                 |                                                                   |
| Cow              |                                                      |                             |                                 |                                                                   |
| Oxen             |                                                      |                             |                                 |                                                                   |
| Chickens         |                                                      |                             |                                 |                                                                   |
| Horses/ donkeys  |                                                      |                             |                                 |                                                                   |
| Other            |                                                      |                             |                                 |                                                                   |

Q.A.4.3.9. Please provide information about any loan taken during last 12 months

Loan Taken

Yes

No

Source:

Banks

Non-Bank (which one please mention -----)

Purpose:

Production

Personal

Development

Interest rate

-----

\*Q.A.4.3.10. Please mention the production per acre and sale price of your farm produce during last 12 months

| <b>Crops</b> | <b>Production per acre (Mds)</b> | <b>Price (sold) per unit (Rs/Md)</b> |
|--------------|----------------------------------|--------------------------------------|
| Wheat        |                                  |                                      |
| Barley       |                                  |                                      |
| Rice         |                                  |                                      |
| Cotton       |                                  |                                      |
| Sugarcane    |                                  |                                      |
| Maize        |                                  |                                      |
| Vegetables   |                                  |                                      |

|        |  |  |
|--------|--|--|
| Others |  |  |
|--------|--|--|

\* Q.A.4.3.11. Please mention; production, consumption and sold livestock during last 12 months

| Livestock Income | Production<br>(Kg for Milk and<br>Numbers for<br>Meat and dozens<br>for eggs) | Home<br>Consumption (Kg<br>for Milk and<br>Numbers for Meat<br>and dozens for<br>eggs) | sold in market |             |
|------------------|-------------------------------------------------------------------------------|----------------------------------------------------------------------------------------|----------------|-------------|
|                  |                                                                               | Quantity                                                                               | Quantity       | Price (Rs.) |
| <b>Milk</b>      |                                                                               |                                                                                        |                |             |
| Goat/ Sheep      |                                                                               |                                                                                        |                |             |
| Cow              |                                                                               |                                                                                        |                |             |
| Buffalo          |                                                                               |                                                                                        |                |             |
| <b>Meat</b>      |                                                                               |                                                                                        |                |             |
| Goat             |                                                                               |                                                                                        |                |             |
| Sheep            |                                                                               |                                                                                        |                |             |
| Buffalo          |                                                                               |                                                                                        |                |             |
| Cow              |                                                                               |                                                                                        |                |             |
| Oxen             |                                                                               |                                                                                        |                |             |
| Chickens Meat    |                                                                               |                                                                                        |                |             |
| Eggs (Dozens)    |                                                                               |                                                                                        |                |             |
| Others           |                                                                               |                                                                                        |                |             |

(\* ) means 'skip if landless'

**A.5. Information about accessibility to input and output markets**

Q.5.1. Please mention the distance to nearest markets from your home/farm etc.

| No. | Distance to nearest | Distance in<br>Kilometres<br>(Km) | Transportation<br>Cost (1 time)<br>in PKR | Transportation<br>Cost (Last 12<br>months) in PKR |
|-----|---------------------|-----------------------------------|-------------------------------------------|---------------------------------------------------|
|     |                     |                                   |                                           |                                                   |

|   |                                                             |  |  |  |
|---|-------------------------------------------------------------|--|--|--|
| 1 | Tarred Road                                                 |  |  |  |
| 2 | Seed and Fertilizer Market                                  |  |  |  |
| 3 | Pesticides Market                                           |  |  |  |
| 4 | Output Market (Mandi) your you sell your farm produce       |  |  |  |
| 5 | PASSCO Centre                                               |  |  |  |
| 6 | Utility Store                                               |  |  |  |
| 7 | Shop from where you purchased food stuff for home use daily |  |  |  |

Q.5.2. Do you have easy access and satisfied with the extension services of Punjab Agricultural Department?

Yes

No

If Yes: to what extent

- i) Dissatisfied
- ii) Less Satisfied
- iii) Satisfied

If No; what are the reasons

- i) .....
- ii) .....
- iii) .....

Q.5.3. Do you have credit access?

Yes

No

If No; what are the reasons

- i) .....
- ii) .....
- iii) .....

Q.5.4. Do you have electricity access at your farm?

Yes

No



Q.5.5. Do you think the extension workers have influence on your sales decisions?

Positive

Negative

Q.5.6. Do you think cooperative societies have influence on your sales decisions?

Positive

Negative

Q.5.7. Do you have access to market information?

Yes

No

If Yes; to what extent

- i) Negligible
- ii) Very less
- iii) less
- iv) Enough
- v) Full

If No; then what are the reasons

- i) .....
- ii) .....
- iii) .....
