# Supplementary material for: Status and determinants of small farming households' food security and role of market access in enhancing food security in rural Pakistan
Source: PubMed Central journal article supplement (PMC5659641; doi:10.1371/journal.pone.0185466), 2017-10-27
Supplement: pone.0185466.s002.pdf [file pone.0185466.s002.pdf]

## S2 Table

**Table. Dietary consumption units according to age and sex**

| Category                      | Consumption Unit |
|-------------------------------|------------------|
| Adult male (Sedentary worker) | 1.0              |
| Adult male (Moderate worker)  | 1.2              |
| Adult male (Heavy worker)     | 1.6              |
| Adult female (Sedentary)      | 0.8              |
| Adult female (Moderate)       | 0.9              |
| Adult female (Heavy)          | 1.2              |
| Adolescent (12–21 years)      | 1.0              |
| Children (9–12 years)         | 0.8              |
| Children (7–9 years)          | 0.7              |
| Children (5–7 years)          | 0.6              |
| Children (3–5 years)          | 0.5              |
| Children (1–3 years)          | 0.4              |

Note: One consumption unit represents calorie consumption of an average adult man, weighing 60 kg, doing sedentary type of work, Source: [43]
