# Supplementary material for: Status and determinants of small farming households' food security and role of market access in enhancing food security in rural Pakistan
Source: PubMed Central journal article supplement (PMC5659641; doi:10.1371/journal.pone.0185466), 2017-10-27
Supplement: pone.0185466.s003.pdf [file pone.0185466.s003.pdf]

**S3Table****FOOD COMPOSITION TABLE FOR PAKISTAN  
(REVISED 2001)**

Amount in 100g of edible portion

| No | Name of Food                      | kcal | No | Name of Food               | Kcal |
|----|-----------------------------------|------|----|----------------------------|------|
| a) | <b>Cereal and Cereal Products</b> |      | 41 | Lichi                      | 62   |
| 1  | Corn Whole grain flour            | 276  | 42 | Mango Ripe                 | 64   |
| 2  | Rice Polished Fried               | 268  | 43 | Melon Water                | 23   |
| 3  | Vermicelli                        | 345  | 44 | Mandarin                   | 44   |
| 4  | Wheat Whole grain flour           | 357  | 45 | Orange Sweet               | 43   |
| 5  | Wheat flour Granular              | 370  | 46 | Peach                      | 47   |
| 6  | Wheat Bread                       | 369  | 47 | Pomegranate                | 66   |
| 7  | Wheat Bread                       | 259  | 48 | Zizyphus                   | 79   |
| 8  | Wheat Bread                       | 364  | G) | <b>Dairy Products</b>      |      |
| 9  | Wheat Bread                       | 293  | 49 | Butter Milk                | 31   |
| 10 | Wheat Bread                       | 263  | 50 | Curd                       | 52   |
| 11 | Wheat Flour                       | 440  | 51 | Cream                      | 361  |
| B) | <b>Legumes</b>                    |      | 52 | Milk Buffalo Fluid Whole   | 105  |
| 12 | Broad Bean Cooked                 | 175  | 53 | Milk Cow Fluid Whole       | 66   |
| 13 | Chickpea Cooked                   | 187  | 54 | Milk Goat Fluid Whole      | 70   |
| 14 | Lentil Cooked                     | 178  | 55 | Yogurt                     | 71   |
| 15 | Mung Bean Cooked                  | 120  | 56 | Ice-cream                  | 148  |
| 16 | Mash Cooked                       | 158  | H) | <b>Meat &amp; Products</b> |      |
| C) | <b>Vegetables</b>                 |      | 57 | Beef                       | 244  |
| 17 | Bath Sponge                       | 18   | 58 | Buffalo Meat               | 123  |
| 18 | Bottle Gourd                      | 15   | 59 | Chicken Meat               | 187  |
| 19 | Bringal                           | 26   | 60 | Goat Meat                  | 164  |
| 20 | Cauliflower                       | 27   | 61 | Sheep Meat                 | 175  |
| 21 | Cucumber                          | 16   | I) | Eggs                       |      |
| 22 | Lady Finger                       | 35   | 62 | Chiken Egg White           | 400  |

|    |                                |     |    |                                        |     |
|----|--------------------------------|-----|----|----------------------------------------|-----|
| 23 | Spinach                        | 27  | 63 | Duck Egg White (Raw)                   | 895 |
| 24 | Tinda                          | 23  | J) | <b>Fats &amp; Oils</b>                 |     |
| D) | <b>Roots &amp; Tubers</b>      |     | 64 | Butter                                 | 721 |
| 25 | Carrots                        | 37  | 65 | Ghee                                   | 874 |
| 26 | Onion                          | 44  | 66 | Ghee (Buffalo)                         | 900 |
| 27 | Potato                         | 83  | 67 | Lard (Raw)                             | 899 |
| 28 | Reddish                        | 23  | 68 | Dalda (Hydrogenated Oil)               | 892 |
| 29 | Turnip                         | 26  | 69 | Corn Oil                               | 900 |
| E) | <b>Spices &amp; Condiments</b> |     | 70 | Soybean                                | 887 |
| 30 | Cumin Seed                     | 336 | K) | <b>Sugar, Sweets &amp; Beverages</b>   |     |
| 31 | Liquorice Root                 | 212 | 71 | Sugar                                  | 380 |
| 32 | Clove                          | 304 | 72 | Gur                                    | 310 |
| 33 | Turmeric                       | 365 | 73 | Honey                                  | 310 |
| 34 | Pepper Black                   | 268 | 74 | Barfi                                  | 384 |
| F) | <b>Fruits</b>                  |     | 75 | Jaleebe                                | 395 |
| 35 | Apple                          | 57  | 76 | Koa (Whole Buffalo Milk)               | 401 |
| 36 | Banana Ripe                    | 96  | 77 | Halwa Sohen                            | 481 |
| 37 | Dates Dried                    | 293 | 78 | Carbonated Beverages Pepsi, Coke, etc. | 39  |
| 38 | Dates Fresh                    | 131 | 79 | Lemon Juice                            | 43  |
| 39 | Guava Whole                    | 73  | 80 | Mango Juice                            | 74  |
| 40 | Lemon                          | 30  |    |                                        |     |

Source: AIOU 2001
